# Supplementary material for: Genome-Wide Identification, Phylogeny, and Expression Analysis of ARF Genes Involved in Vegetative Organs Development in Switchgrass
Source: Int J Genomics. 2018 Apr 29;2018:7658910. doi: 10.1155/2018/7658910 (PMC5949158; doi:10.1155/2018/7658910)
Supplement: Supplementary Materials — Figure S1: twelve conserved motifs in PvARF analyzed by MEME search tool. The height of each box represents the specific amino acid conservation in each motif. Table S1: primer sequences used for gene expression analysis by qRT-PCR. Table S2: phylogenetic relationships of ARFs. Table S3: putative cis-acting DNA elements in the promoter of PvARF genes. [file 7658910.f1.zip › 7658910.f1/Table S1.xlsx]

## Sheet: Sheet1
Table S1. Primer sequences used for gene expression analysis by qRT-PCR.
Primer name	Forward primer	Reverse primer	Functional identification
PvARF1/2	ATTCTTCTCGTCGGCGACGAC	ATGCTGCCGGTGAGGTTCTGC	For qRT-PCR to detect expression level of endogenous transcript
PvARF3/4	GGCAGGAATTCGTGAGTACG	TAGGGAACTAGGGCGCCTATTTG	For qRT-PCR to detect expression level of endogenous transcript
PvARF5/6	GTAGTCATCACAGCTGCTACCGA	CTCAGGCTTCTTGATTCCTG	For qRT-PCR to detect expression level of endogenous transcript
PvARF7/8	AGGTCATTGGACATCACCCG	GGAGAAGCACATCATTCTCCC	For qRT-PCR to detect expression level of endogenous transcript
PvARF9/10	TGGCGAAACCTTCAGGTTGG	CATTGAACTAGGCTCAGGCC	For qRT-PCR to detect expression level of endogenous transcript
PvARF11/12	TAGTTGGAGATGACCCATGGG	TAGTCACCGCTAACCCTCCAT	For qRT-PCR to detect expression level of endogenous transcript
PvARF13/14	AGGGGCAACTTGAGGAACG	GAGTTCTGATCGCAGCGAG	For qRT-PCR to detect expression level of endogenous transcript
PvARF15/16	CCGACAGAGAATAGGCTGGA	CCACCATCTGAGCTGCTGCAA	For qRT-PCR to detect expression level of endogenous transcript
PvARF17/18	GTGTCAGGTGCATCCGGATT	AGAGAACTCGATGCATGCGC	For qRT-PCR to detect expression level of endogenous transcript
PvARF19/20	CCAATTCCTGCTGGCATGCA	CTTCTTCGGAAGCACCATTGG	For qRT-PCR to detect expression level of endogenous transcript
PvARF21/22	GTCGGACCATCGATTTGTCTG	TCAAGCCCGCTCCACCATAT	For qRT-PCR to detect expression level of endogenous transcript
PvARF23/24	GATGTTGGGCGCACACTTGA	ACCTCGCTAAGCTATCGCTG	For qRT-PCR to detect expression level of endogenous transcript
PvARF25/26	AAGGTGTTCGTCGAGTCCGAC	CTAGCTCCCTAGGTTGTCGCT	For qRT-PCR to detect expression level of endogenous transcript
PvARF27/28	ATACAGGGAGCCAGGCATGCG	AGCCGGAGCGATCCGGTGTGTT	For qRT-PCR to detect expression level of endogenous transcript
PvARF29/30	TTGGGAAGGAGGGAGCAGAT	GCCAACAACAGGCCTTTGCTC	For qRT-PCR to detect expression level of endogenous transcript
PvARF31/32	TGTCACACAAGCTGTGGCCTTG	GAACCATGCCACATAGGCTCTG	For qRT-PCR to detect expression level of endogenous transcript
PvARF33/34	TTCAACCCAAGGACTGGTGCT	TGATACCTGGAGACATCTCC	For qRT-PCR to detect expression level of endogenous transcript
PvARF35/36	TCAGCACCTGGAGATGCTGCTA	GTGGAGCGGTTGTACCCGAACA	For qRT-PCR to detect expression level of endogenous transcript
PvARF37/38	ATGGTGAGCTGAGCAGTCCTC	TGGAGCCTCCTTGGAACCCAA	For qRT-PCR to detect expression level of endogenous transcript
PvARF39	AATGCTCTAGCCTCCTTCCC	GGGCTGTCAAGGTGAATTCC	For qRT-PCR to detect expression level of endogenous transcript
PvARF40/41	GCAAGGAGTTGCACTTGGCA	CTACTCATTTGTGGCCGCAC	For qRT-PCR to detect expression level of endogenous transcript
PvARF42/43	CTGGGAGGACTCGAATTAAG	GGATCACAATCTTCCTCACC	For qRT-PCR to detect expression level of endogenous transcript
PvARF44/45	GTCTGGGAAGCATGCCAGCTA	AGCTGGAGGAAGTTCTGGAGC	For qRT-PCR to detect expression level of endogenous transcript
PvARF46/47	GGCTGTAGACCTGACAAAGCTT	CATCACTCAACTTGCTGGTGTC	For qRT-PCR to detect expression level of endogenous transcript
PvUBQ	TTCGTGGTGGCCAGTAAG	AGAGACCAGAAGACCCAGGTACAG	For qRT-PCR to detect expression level of endogenous transcript

## Sheet: Sheet2
	PvARF1 F：	ATTCTTCTCGTCGGCGACGAC	21				PvARF3-1 F：		23
	PvARF1 R：	ATGCTGCCGGTGAGGTTCTGC	21				PvARF3-1 R：		23
	PvARF3 F：	GGCAGGAATTCGTGAGTACG	20				PvARF3-2 F：	TTGTATTCGTCGACCGAGAGGAG	23
	PvARF3 R：	TAGGGAACTAGGGCGCCTATTTG	20				PvARF3-2 R：	GCTTCTTGACTCCTGCCTGCTAA	23
	PvARF5 F：	GTAGTCATCACAGCTGCTACCGA	20				PvARF39-1 F：		20
	PvARF5 R：	CTCAGGCTTCTTGATTCCTG	20				PvARF39 -1R：		20
	PvARF7 F：	AGGTCATTGGACATCACCCG	20
	PvARF7 R：	GGAGAAGCACATCATTCTCCC	21
	PvARF9 F：	TGGCGAAACCTTCAGGTTGG	20
	PvARF9 R：	CATTGAACTAGGCTCAGGCC	20
	PvARF11F：	TAGTTGGAGATGACCCATGGG	21
	PvARF11R：	TAGTCACCGCTAACCCTCCAT	21
	PvARF13 F：	AGGGGCAACTTGAGGAACG	19
	PvARF13 R：	GAGTTCTGATCGCAGCGAG	19
	PvARF15 F：	CCGACAGAGAATAGGCTGGA	20
	PvARF15R：	CCACCATCTGAGCTGCTGCAA	21
	PvARF17 F：	GTGTCAGGTGCATCCGGATT	20
	PvARF17 R：	AGAGAACTCGATGCATGCGC	20
	PvARF19 F：	CCAATTCCTGCTGGCATGCA	20
	PvARF19 R：	CTTCTTCGGAAGCACCATTGG	21
	PvARF21 F：	GTCGGACCATCGATTTGTCTG	21
	PvARF21 R：	TCAAGCCCGCTCCACCATAT	20
	PvARF23 F：	GATGTTGGGCGCACACTTGA	20
	PvARF23 R：	ACCTCGCTAAGCTATCGCTG	20
	PvARF25 F：	AAGGTGTTCGTCGAGTCCGAC	21
	PvARF25 R：	CTAGCTCCCTAGGTTGTCGCT	21
	PvARF27 F：	ATACAGGGAGCCAGGCATGCG	21
	PvARF27 R：	AGCCGGAGCGATCCGGTGTGTT	22
	PvARF29 F：	TTGGGAAGGAGGGAGCAGAT	20
	PvARF29 R：	GCCAACAACAGGCCTTTGCTC	21
	PvARF31 F：	TGTCACACAAGCTGTGGCCTTG	22
	PvARF31 R：	GAACCATGCCACATAGGCTCTG	22
	PvARF33 F：	TTCAACCCAAGGACTGGTGCT	21
	PvARF33R：	TGATACCTGGAGACATCTCC	20
	PvARF35 F：	TCAGCACCTGGAGATGCTGCTA	22
	PvARF35 R：	GTGGAGCGGTTGTACCCGAACA	22
	PvARF37F：	ATGGTGAGCTGAGCAGTCCTC	21
	PvARF37 R：	TGGAGCCTCCTTGGAACCCAA	21
	PvARF39 F：	AATGCTCTAGCCTCCTTCCC	21
	PvARF39 R：	GGGCTGTCAAGGTGAATTCC	21
	PvARF40 F：	GCAAGGAGTTGCACTTGGCA	20
	PvARF40 R：	CTACTCATTTGTGGCCGCAC	20
	PvARF42F：	CTGGGAGGACTCGAATTAAG	20
	PvARF42R：	GGATCACAATCTTCCTCACC	20
	PvARF44F：	GTCTGGGAAGCATGCCAGCTA	21
	PvARF44R：	AGCTGGAGGAAGTTCTGGAGC	21
	PvARF46F：	GGCTGTAGACCTGACAAAGCTT	22
	PvARF46R：	CATCACTCAACTTGCTGGTGTC	22
