# Supplementary material for: Genome-Wide Identification, Phylogeny, and Expression Analysis of ARF Genes Involved in Vegetative Organs Development in Switchgrass
Source: Int J Genomics. 2018 Apr 29;2018:7658910. doi: 10.1155/2018/7658910 (PMC5949158; doi:10.1155/2018/7658910)
Supplement: Supplementary Materials — Figure S1: twelve conserved motifs in PvARF analyzed by MEME search tool. The height of each box represents the specific amino acid conservation in each motif. Table S1: primer sequences used for gene expression analysis by qRT-PCR. Table S2: phylogenetic relationships of ARFs. Table S3: putative cis-acting DNA elements in the promoter of PvARF genes. [file 7658910.f1.zip › 7658910.f1/Table S2.xlsx]

## Sheet: Sheet1
Table S2 Phylogenetic relationships of ARFs.
Classes	Panicum virgatum	Dicotyledon										Monocotyledon
		Arabidopsis	Citrus sinensis	Brassica rapa	Populus trichocarpa	Medicago truncatula	Gossypium raimondii	Eucalyptus grandis	Glycine max	Solanum lycopersicum	Vitis vinifera	Zea mays	Oryza sativa	Setaria italica	Sorghum bicolor	Brachypodium distachyon
Cluster Ⅰ	PvARF24	AtARF10	CiARF15	BrARF10	PoptrARF10.2	MtARF8	GrARF10b	EgrARF16B	GmARF21	Sl-ARF10B	VvARF7	ZmARF19	OsARF18	Seita.4G257800.1	Sobic.010G236300.1	Bradi1g33160.1
	PvARF23	AtARF16	CiARF13	BrARF16-1	PoptrARF10.1	MtARF22	GrARF10a	EgrARF16A	GmARF35	Sl-ARF16A	VvARF14	ZmARF21	OsARF22	seita.9G219800.1	Sobic.001G217300.1	Bradi3g28950.1
	PvARF22	AtARF17	CiARF16	BrARF16-2	PoptrARF16.3	MtARF17	GrARF16b	EgrARF10	GmARF29	Sl-ARF10A	VvARF17	ZmARF2	OsARF10	Seita.7G169600.1	Sobic.006G149600.1	Bradi5g15904.1
	PvARF21		CiARF17	BrARF17-2	PoptrARF16.4	MtARF19	GrARF16a	EgrARF17	GmARF26	Sl-ARF16B		ZmARF17	OsARF8	Seita.1G241500.1	Sobic.002G290600.1	Bradi3g49320.1
	PvARF28			BrARF17-1	PoptrARF16.2	MtARF18	GrARF16c		GmARF23	Sl-ARF17		ZmARF8			Sobic.004G221400.1
	PvARF27				PoptrARF16.1	MtARF16	GrARF16d		GmARF38			ZmARF15
	PvARF26				PoptrARF16.5	MtARF21	GrARF17b		GmARF30
	PvARF25				PoptrARF16.6	MtARF15	GrARF17a		GmARF08
					PoptrARF17.2	MtARF14
					PoptrARF17.1	MtARF3
						MtARF4
						MtARF10
Cluster Ⅱ	PvARF19											ZmARF31	OsARF20	Seita.3G003300.1	Sobic.006G278900.1	Bradi5g27400.1
	PvARF20											ZmARF5	OsARF13
Cluster Ⅲ	PvARF8	AtARF8	CiARF8	BrARF8-2	PoptrARF8.1	MtARF9	GrARF8c	EgrARF6A	GmARF48	Sl-ARF8A	VvARF3	ZmARF30	OsARF12	Seita.3G02000.1	Sobic.006G262100.1	Bradi5g25767.1
	PvARF7	AtARF6	CiARF6	BrARF8-1	PoptrARF8.2	MtARF20	GrARF8a	EgrARF6B	GmARF24	Sl-ARF8B	VvARF12	ZmARF3	OsARF17	Seita.1G077200.1	Sobic.004G051900.1	Bradi1g32547.1
	PvARF6		CiARF10	BrARF6	PoptrARF6.4	MtARF6	GrARF6a		GmARF39	Sl-ARF6B	VvARF9	ZmARF16	OsARF6	Seita.4G282300.1	Sobic.010G229000.1	Bradi3g04920.1
	PvARF5				PoptrARF6.5		GrARF6b		GmARF37	Sl-ARF6A		ZmARF18	OsARF25	Seita.3G394000.1	Sobic.008G169400.1	Bradi4g01730.1
	PvARF3				PoptrARF6.2		GrARF8d		GmARF33			ZmARF22
	PvARF4				PoptrARF6.1		GrARF8b		GmARF42			ZmARF9
	PvARF1								GmARF04
	PvARF2								GmARF09
									GmARF19
Cluster Ⅳ	PvARF16	AtARF19	CiARF7	BrARF19-2	PoptrARF7.4	MtARF24	GrARF19.2	EgrARF19B	GmARF10	Sl-ARF7B	VvARF11	ZmARF20	OsARF5	Seita.1G090900.1	Sobic.004G037800.1	Bradi1g34340.1
	PvARF15	AtARF7	CiARF19	BrARF19-1	PoptrARF7.3	MtARF13	GrARF19.1a	EgrARF19A	GmARF14	Sl-ARF7A	VvARF10	ZmARF1	OsARF19	Seita.4G240600.1	Sobic.010G253300.1	Bradi3g03407.1
	PvARF14			BrARF7-2	PoptrARF7.1		GrARF19.1b		GmARF01	Sl-ARF19		ZmARF27	OsARF21	Seita.6G212000.1	Sobic.007G203500.1	Bradi3g40437.2
	PvARF13			BrARF7-1					GmARF43				OsARF16	Seita.4G040100.1	Sobic.010G073600.1	Bradi1g46602.6
	PvARF11								GmARF20
	PvARF12								GmARF46
	PvARF10								GmARF31
	PvARF9
Cluster Ⅴ	PvARF18	AtARF5	CiARF5	BrARF5-3	PoptrARF5.2		GrARF5a	EgrARF5	GmARF47	Sl-ARF5	VvARF18	ZmARF4	OsARF11	Seita.3G028100.1	Sobic.006G255300.1	Bradi5g25157.1
	PvARF17			BrARF5-1	PoptrARF5.1		GrARF5b		GmARF40			ZmARF29
				BrARF5-2
Cluster Ⅵ	PvARF36	AtARF3	CiARF3	BrARF3-2	PoptrARF3.1	MtARF5	GrARF3c	EgrARF3	GmARF32	Sl-ARF3	VvARF8	ZmARF11	OsARF3	Seita.5G32100.1	Sobic.003G298600.8	Bradi2g50120.2
	PvARF35	AtARF4	CiARF14	BrARF3-1	PoptrARF3.2	MtARF7	GrARF3b	EgrARF4	GmARF16	Sl-ARF4	VvARF5	ZmARF26	OsARF14	Seita.3G179300.1	Sobic.009G196900.1	Bradi2g19867.1
	PvARF34		CiARF4	BrARF4	PoptrARF3.3	MtARF12	GrARF3a		GmARF41			ZmARF23	OsARF2	Seita.5G265200.1	Sobic.003G251700.1	Bradi2g46190.1
	PvARF33				PoptrARF4		GrARF4b		GmARF34			ZmARF12	OsARF15	Seita.3G147000.1	Sobic.009G231800.1	Bradi2g16610.2
	PvARF32						GrARF4a		GmARF36			ZmARF24
	PvARF31								GmARF28
	PvARF30								GmARF25
	PvARF29								GmARF22
Cluster Ⅶ	PvARF47	AtARF9	CiARF9	BrARF9-1	PoptrARF9.1	MtARF11	GrARF9b	EgrARF9B	GmARF49	Sl-ARF18	VvARF2	ZmARF6	OsARF9	Seita.7G108100.1	Sobic.006G089500.1	Bradi5g10950.1
	PvARF46	AtARF1	CiARF18	BrARF9-2	PoptrARF9.2	MtARF2	GrARF9a	EgrARF9A	GmARF15	Sl-ARF9A	VvARF15	ZmARF14	OsARF7	Seita.1G195500.1	Sobic.004G178500.1	Bradi3g45880.2
	PvARF45	AtARF18	CiARF2	BrARF1	PoptrARF9.3	MtARF23	GrARF18b	EgrARF1	GmARF05	Sl-ARF9B	VvARF13	ZmARF7	OsARF1	Seita.5G004300.1	Sobic.003G003800.1	Bradi2g08120.2
	PvARF44	AtARF11		BrARF18-2	PoptrARF1.1		GrARF18a	EgrARF24	GmARF02	Sl-ARF1	VvARF19	ZmARF10	OsARF4	Seita.5G438100.1	Sobic.003G411900.1	Bradi2g59480.1
	PvARF42	AtARF13		BrARF18-1	PoptrARF1.2		GrARF11	EgrARF2A	GmARF06	Sl-ARF24	VvARF16	ZmARF25	OsARF24	Seita.8G135700.1	Sobic.005G132000.1	Bradi4g17410.1
	PvARF43	AtARF20		BrARF11	PoptrARF2.6		GrARF1	EgrARF2B	GmARF45	Sl-ARF2B	VvARF1	ZmARF13		Seita.3G321500.1	Sobic.008G096000.1
	PvARF39	AtARF12		BrARF25	PoptrARF2.2		GrARF2e		GmARF13	Sl-ARF2A		ZmARF28
	PvARF41	AtARF15		BrARF24	PoptrARF2.1		GrARF2d		GmARF44
	PvARF40	AtARF14		BrARF27	PoptrARF2.3		GrARF2b		GmARF27
	PvARF37	AtARF21		BrARF26	PoptrARF2.4		GrARF2c		GmARF17
	PvARF38	AtARF22		BrARF2-3			GrARF2a		GmARF50
		AtARF2		BrARF2-2					GmARF18
				BrARF2-1					GmARF11
									GmARF12
									GmARF07
