# Supplementary material for: Genome-Wide Identification, Phylogeny, and Expression Analysis of ARF Genes Involved in Vegetative Organs Development in Switchgrass
Source: Int J Genomics. 2018 Apr 29;2018:7658910. doi: 10.1155/2018/7658910 (PMC5949158; doi:10.1155/2018/7658910)
Supplement: Supplementary Materials — Figure S1: twelve conserved motifs in PvARF analyzed by MEME search tool. The height of each box represents the specific amino acid conservation in each motif. Table S1: primer sequences used for gene expression analysis by qRT-PCR. Table S2: phylogenetic relationships of ARFs. Table S3: putative cis-acting DNA elements in the promoter of PvARF genes. [file 7658910.f1.zip › 7658910.f1/Table S3.xlsx]

## Sheet: Sheet1
Table S3 Putative cis-acting DNA elements in the promoter of PvARF genes
Clades	element ID	element seq.	putative function
Clade A	GATABOX	GATA	multiple signaling
	EBOXBNNAPA	CANNTG	multiple signaling
	MYBCORE	CNGTTR	abiotic stress; secondary metabolism
	DOFCOREZM	AAAG	carbon metabolism
	CACTFTPPCA1	YACT	carbon metabolism
	ARR1AT	NGATT	phytohormone signaling
	ACGTATERD1	ACGT	dehydration stress
	GTGANTG10	GTGA	pollen development
	NODCON2GM	CTCTT	nodulin formation
	OSE2ROOTNODULE	CTCTT	nodulin formation
	MYCCONSENSUSAT	CANNTG	abiotic stress
	CGCGBOXAT	VCGCGB	multiple signaling
	RHERPATEXPA7	KCACGW	root hair patternning
Clade B	GATABOX	GATA	multiple signaling
	EBOXBNNAPA	CANNTG	multiple signaling
	MYBCORE	CNGTTR	abiotic stress; secondary metabolism
	GT1CONSENSUS	GRWAAW	SA signaling
	DOFCOREZM	AAAG	carbon metabolism
	GTGANTG10	GTGA	pollen development
	MYCCONSENSUSAT	CANNTG	abiotic stress
	ACGTATERD1	ACGT	early responsive to dehydration
	WRKY71OS	TGAC	GA signaling; plant defense
	CACTFTPPCA1	YACT	carbon metabolism
	ARR1AT	NGATT	phytohormone signaling
	WBOXNTERF3	TGACY	wounding response
	CURECORECR	GTAC	oxygen-response; copper response
	CGCGBOXAT	VCGCGB	multiple signaling
Clade C	EBOXBNNAPA	CANNTG	multiple signaling
	POLLEN1LELAT52	AGAAA	anther and pollen development
	DOFCOREZM	AAAG	carbon metabolism
	GTGANTG10	GTGA	pollen development
	INRNTPSADB	YTCANTYY	light response
	MYCCONSENSUSAT	CANNTG	abiotic stress
	WRKY71OS	TGAC	GA signaling; plant defense
	CACTFTPPCA1	YACT	carbon metabolism
	ARR1AT	NGATT	phytohormone signaling
	WBOXNTERF3	TGACY	wounding response
	CURECORECR	GTAC	oxygen-response; copper response
